# Supplementary material for: Functional outcome and Quality of Life (QoL) in patients undergoing radical prostatectomy without prior prostate biopsy
Source: Research Square preprint supplement (doi:10.21203/rs.3.rs-7969738/v1), 2025-12-01

**Suppl. Fig. 1:** Comparison of quality of life (GHS, PF, EF) between biopsy and non-biopsy groups before radical prostatectomy in unmatched patient and matched patient cohorts with prostate cancer subgroup (pT2).

GHS: Global health status; PF: Physical functioning; EF: Emotional functioning.

a: GHS in the unmatched cohort(pT2); b: GHS in the matched cohort(pT2);

c: PF in the unmatched cohort(pT2); d: PF in the matched cohort(pT2);

e: EF in the unmatched cohort(pT2); f: EF in the matched cohort(pT2);

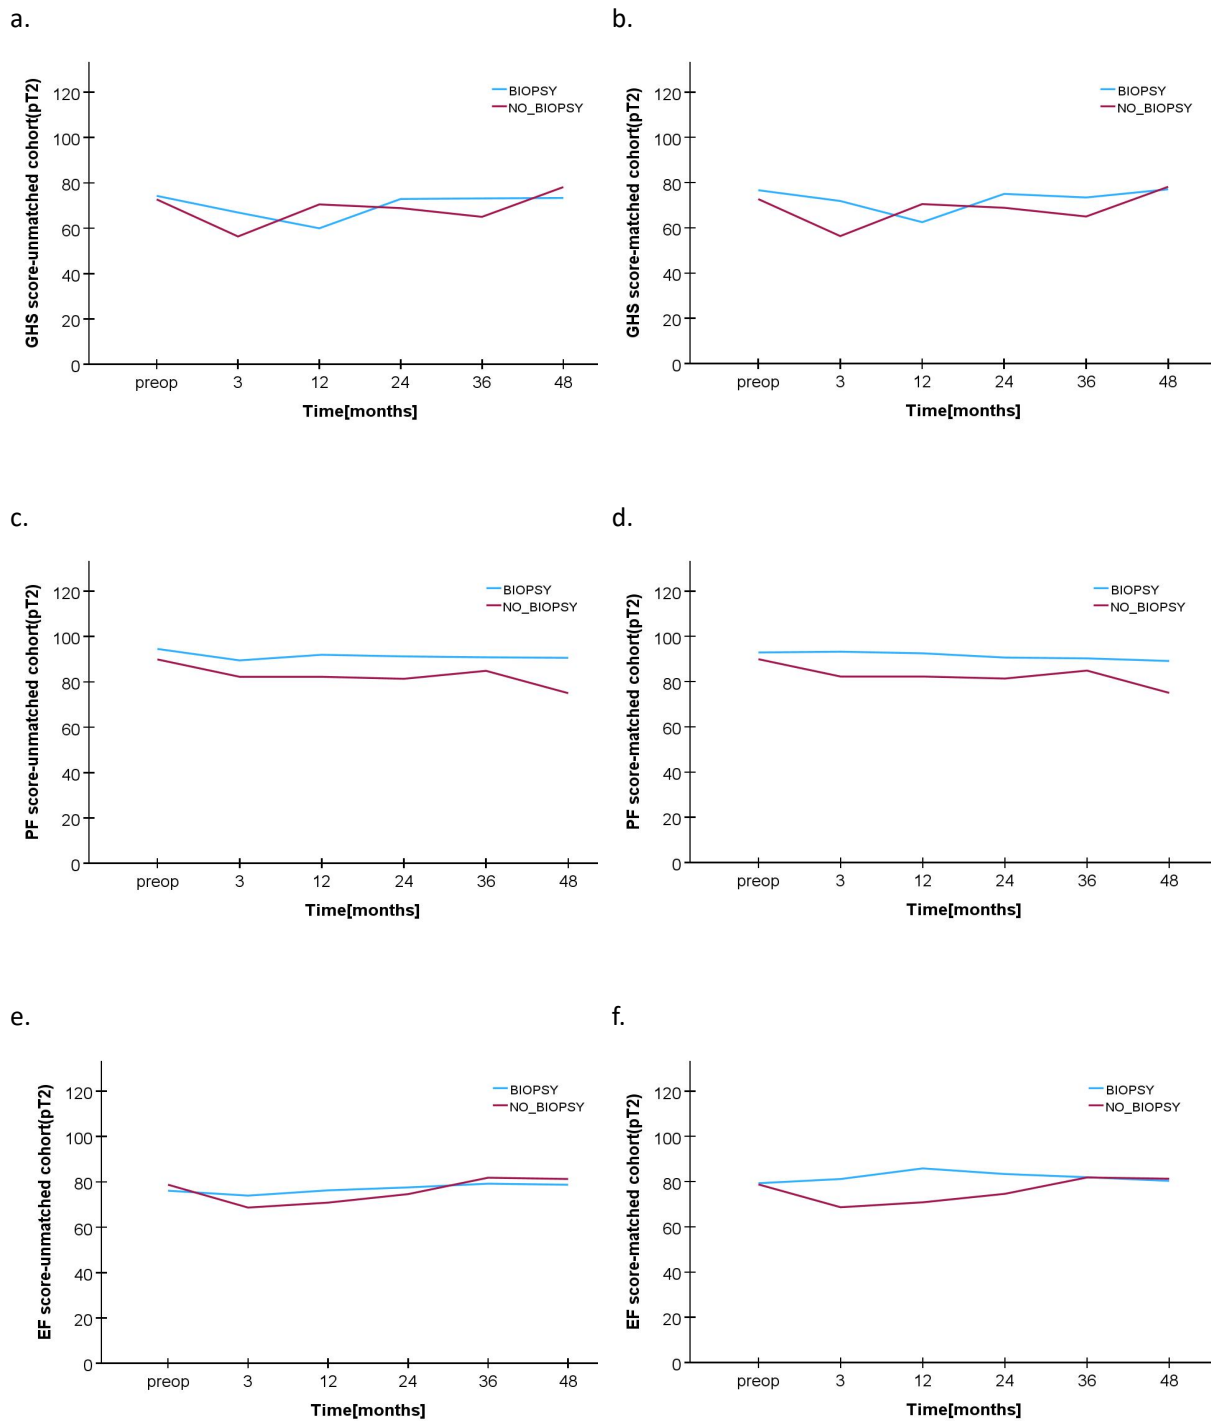

**Suppl. Fig. 2:** Comparison of functional outcomes (urinary incontinence) between biopsy and non-biopsy groups before radical prostatectomy in unmatched patient and matched patient cohorts with prostate cancer subgroup (pT2).

ICIQ-score: International Consultation on Incontinence Questionnaire; Pads/day: the number of incontinence pads used per day.

a: ICIQ in the unmatched cohort(pT2); b: ICIQ in the matched cohort(pT2);

c: Pads/day in the unmatched cohort(pT2); d: Pads/day in the matched cohort(pT2);

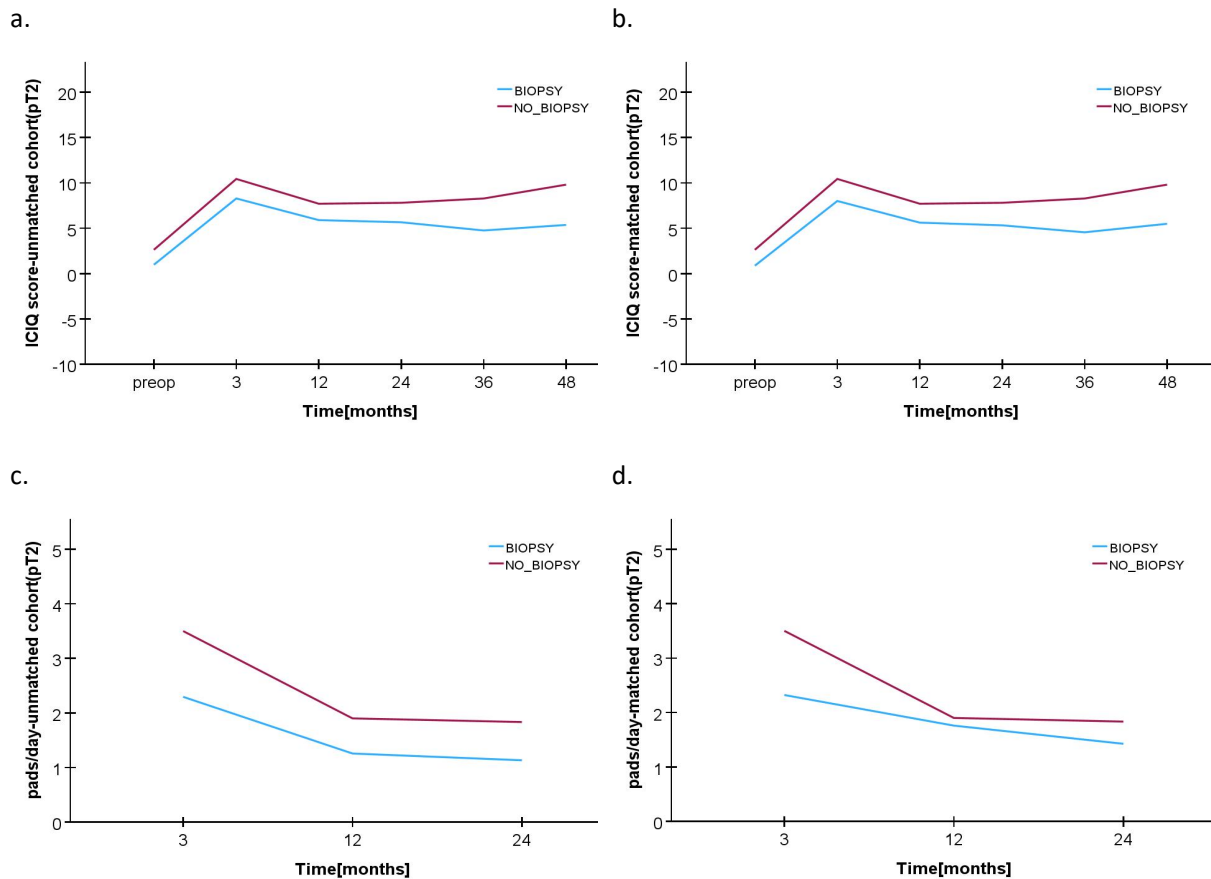

**Suppl. Fig. 3:** Comparison of quality of life (RF,CF,SF,FA,NV,PA,DY,SL,AP,CO,DI,FI) and IIEF score between biopsy and non-biopsy groups before radical prostatectomy in unmatched patient and matched patient cohorts with prostate cancer.

RF: Role functioning ;CF:Cognitive functioning;SF:Social functioning;FA:Fatigue;

NV:Nausea and vomiting;PA:Pain;DY:Dyspnoea;SL:Insomnia;AP:Appetite loss;

CO:Constipation;DI:Diarrhoea;FI:Financial difficulties;

IIEF:International Index of Erectile Function

a: RF in the unmatched cohort; b: RF in the matched cohort

c: CF in the unmatched cohort; d: CF in the matched cohort

e: SF in the unmatched cohort; f: SF in the matched cohort

g: FA in the unmatched cohort; h: FA in the matched cohort

i: NV in the unmatched cohort; j: NV in the matched cohort

k: PA in the unmatched cohort; l: PA in the matched cohort

m: DY in the unmatched cohort; n: DY in the matched cohort

o: SL in the unmatched cohort; p: SL in the matched cohort

q: AP in the unmatched cohort; r: AP in the matched cohort

s: CO in the unmatched cohort; t: CO in the matched cohort

u: DI in the unmatched cohort; v: DI in the matched cohort

w: FI in the unmatched cohort; x: FI in the matched cohort

y: IIEF in the unmatched cohort; z: IIEF in the matched cohort

a.

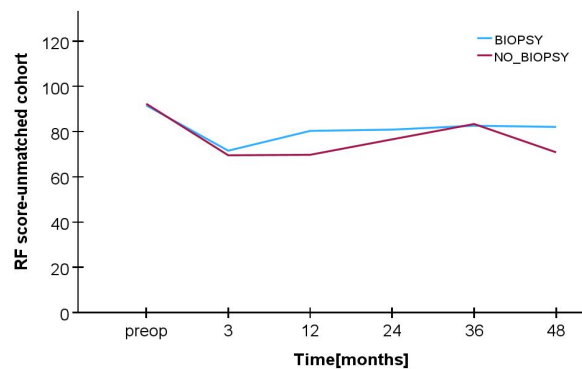

b.

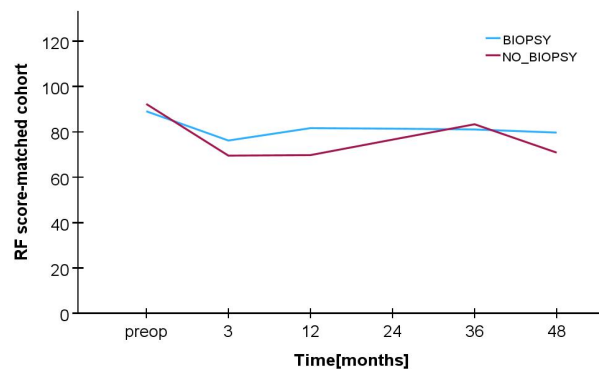

c.

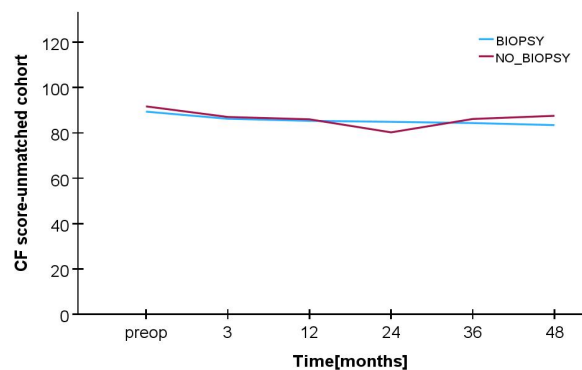

d.

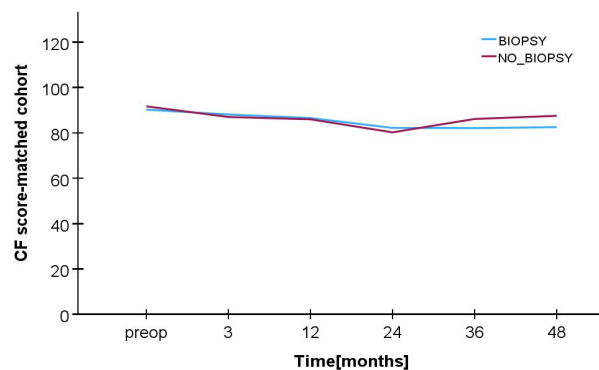

e.

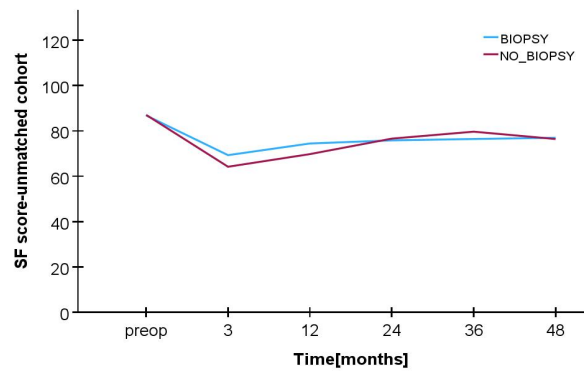

f.

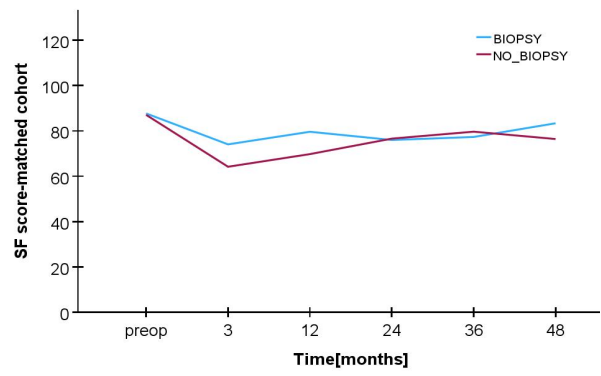

g.

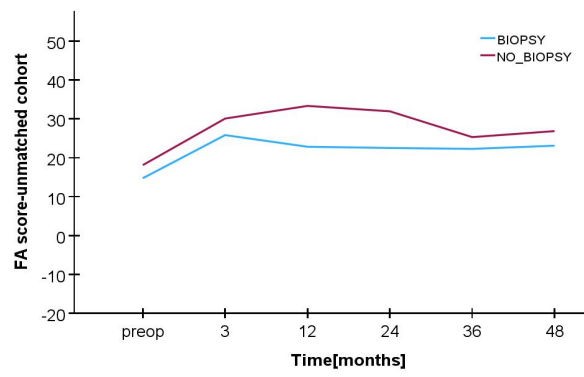

h.

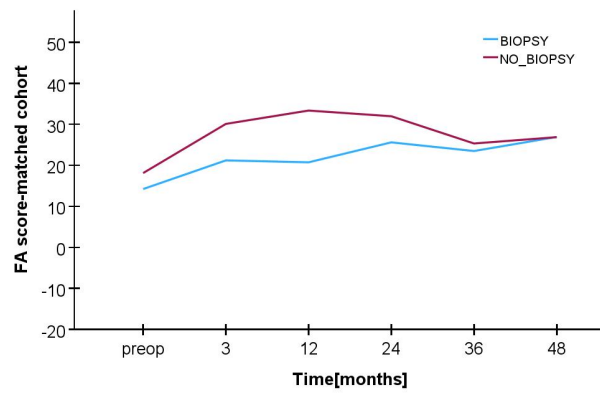

i.

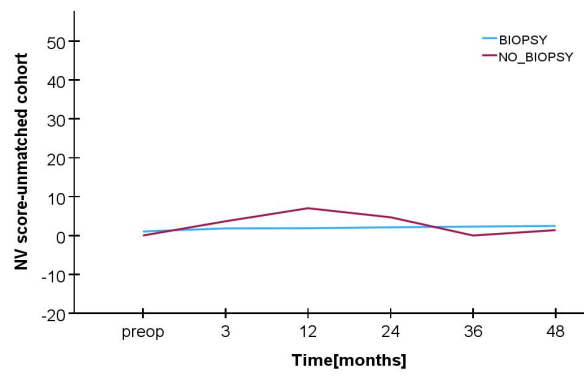

j.

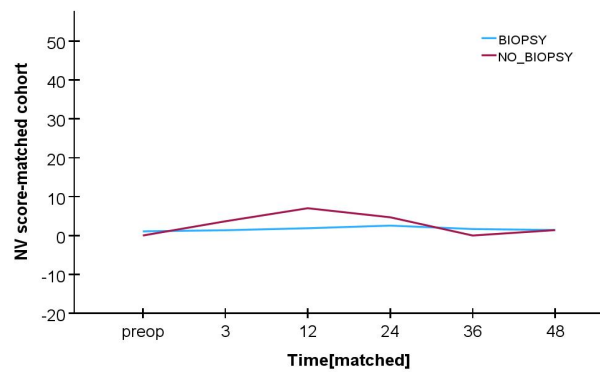

k.

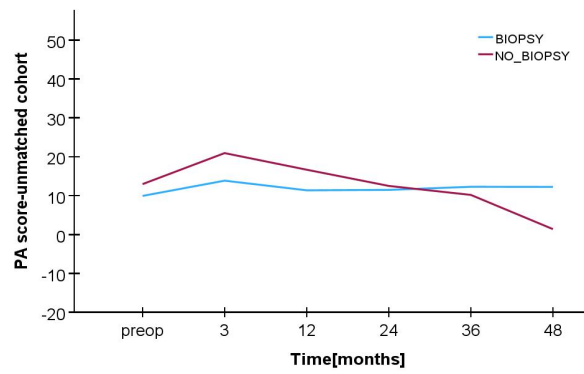

l.

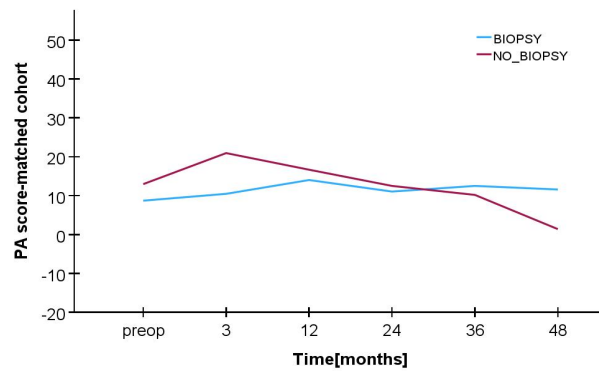

m.

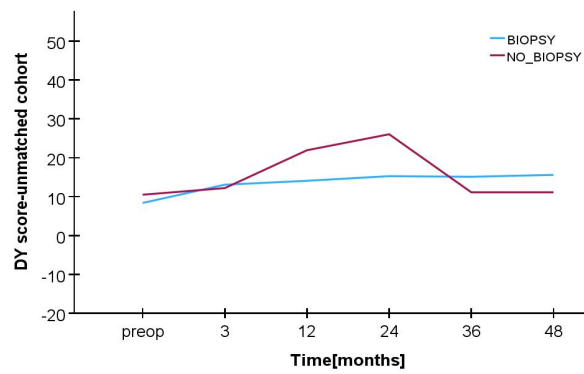

n.

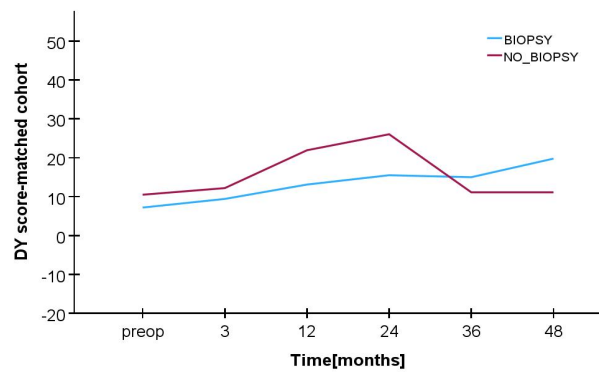

o.

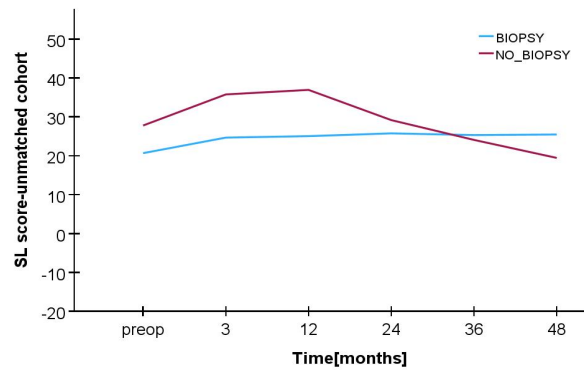

p.

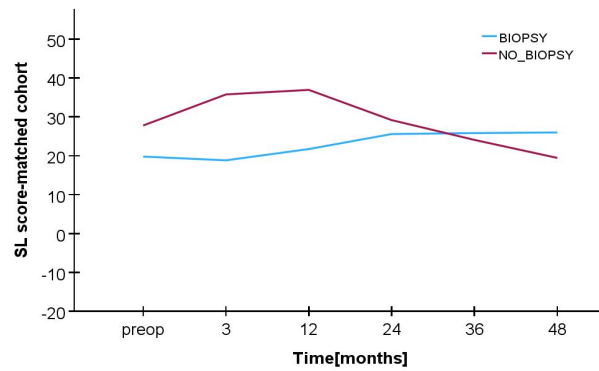

q.

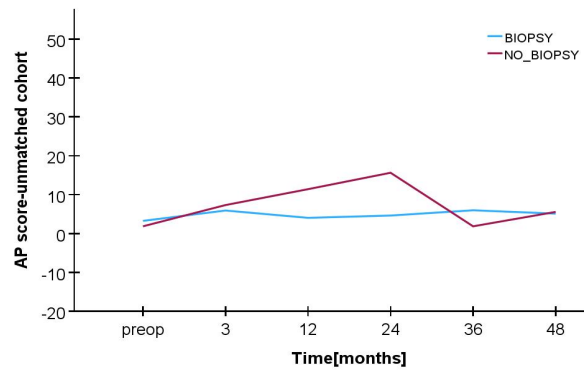

r.

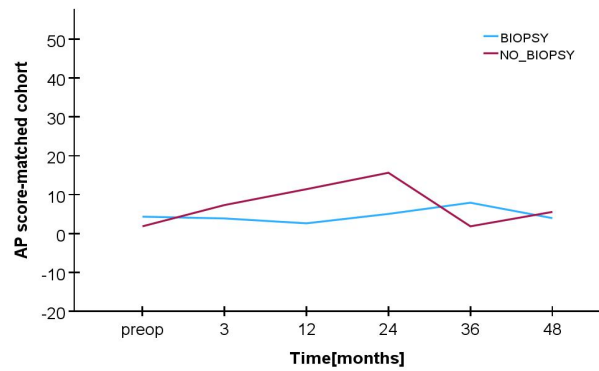

s.

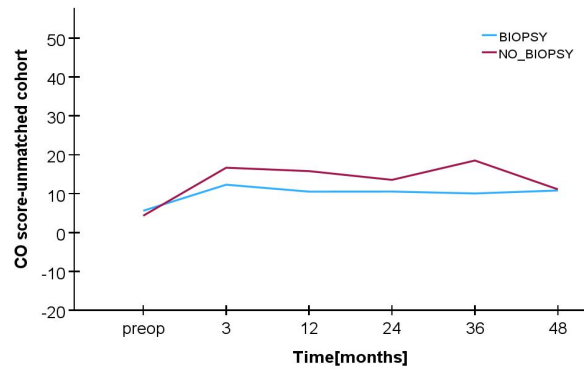

t.

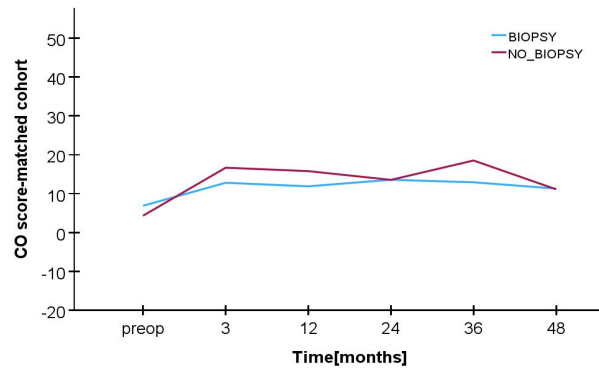

u.

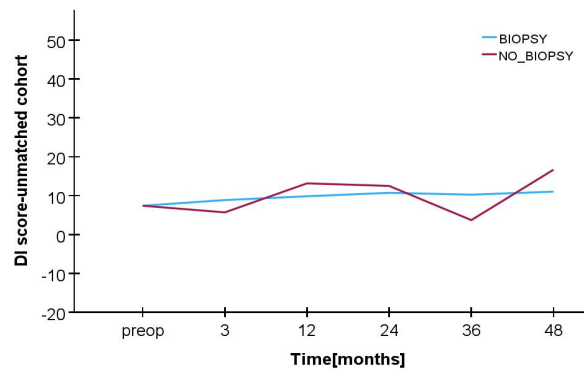

v.

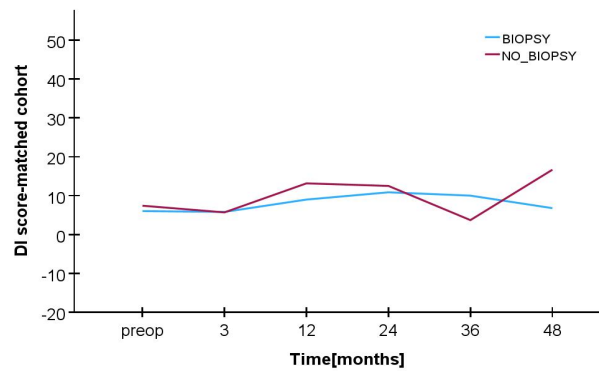

w.

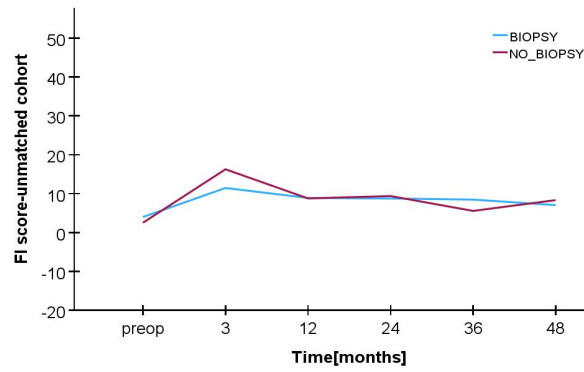

x.

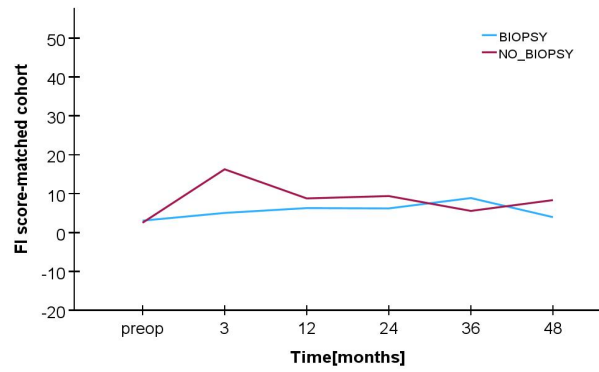

y.

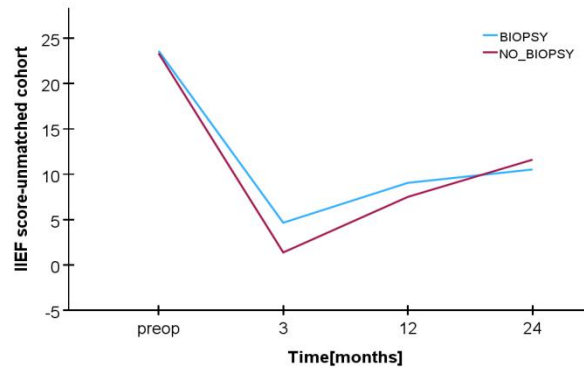

z.

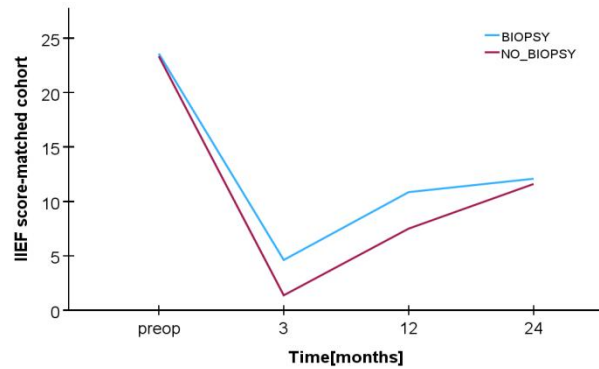

**Suppl. Fig. 4:** Comparison of quality of life (RF,CF,SF,FA,NV,PA,DY,SL,AP,CO,DI,FI) and IIEF score between biopsy and non-biopsy groups before radical prostatectomy in unmatched patient and matched patient cohorts with prostate cancer subgroup (pT2).

RF: Role functioning ;CF:Cognitive functioning;SF:Social functioning;FA:Fatigue;

NV:Nausea and vomiting;PA:Pain;DY:Dyspnoea;SL:Insomnia;AP:Appetite loss;

CO:Constipation;DI:Diarrhoea;FI:Financial difficulties;

IIEF:International Index of Erectile Function

a: RF in the unmatched cohort (pT2); b: RF in the matched cohort (pT2)

c: CF in the unmatched cohort (pT2); d: CF in the matched cohort (pT2)

e: SF in the unmatched cohort (pT2); f: SF in the matched cohort (pT2)

g: FA in the unmatched cohort (pT2); h: FA in the matched cohort (pT2)

i: NV in the unmatched cohort (pT2); j: NV in the matched cohort (pT2)

k: PA in the unmatched cohort (pT2); l: PA in the matched cohort (pT2)

m: DY in the unmatched cohort (pT2); n: DY in the matched cohort (pT2)

o: SL in the unmatched cohort (pT2); p: SL in the matched cohort (pT2)

q: AP in the unmatched cohort (pT2); r: AP in the matched cohort (pT2)

s: CO in the unmatched cohort (pT2); t: CO in the matched cohort (pT2)

u: DI in the unmatched cohort (pT2); v: DI in the matched cohort (pT2)

w: FI in the unmatched cohort (pT2); x: FI in the matched cohort (pT2)

y: IIEF in the unmatched cohort (pT2); z: IIEF in the matched cohort (pT2)

a.

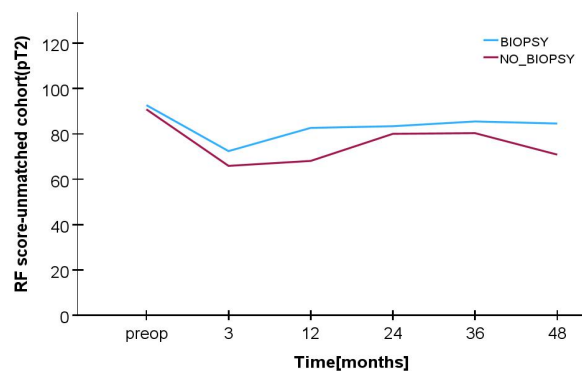

b.

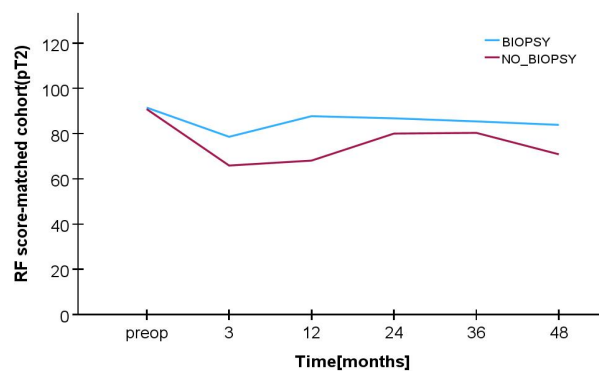

c.

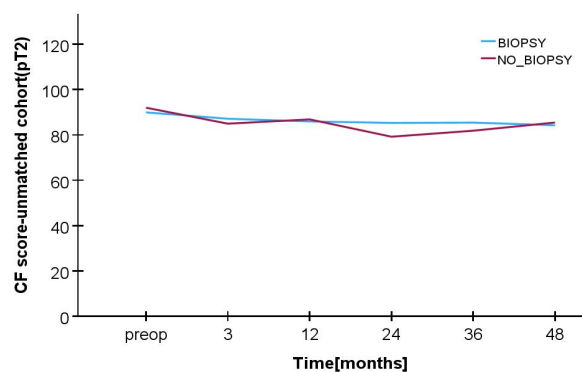

d.

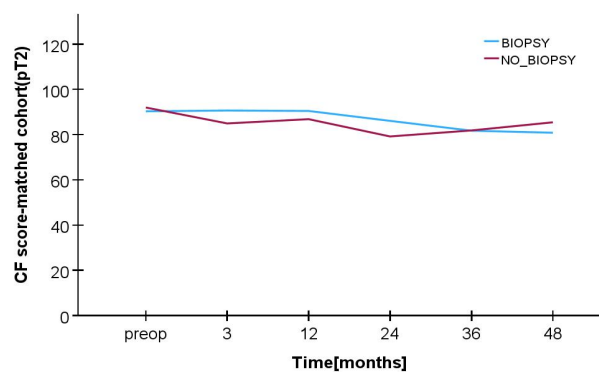

e.

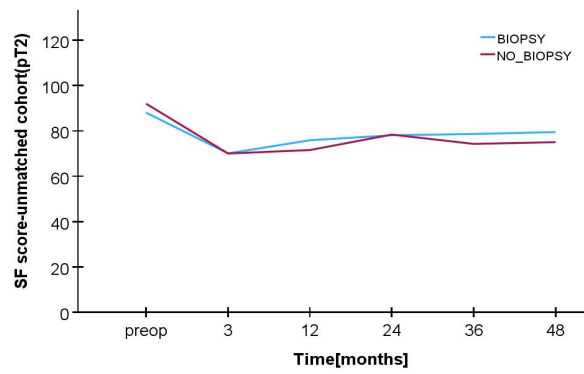

f.

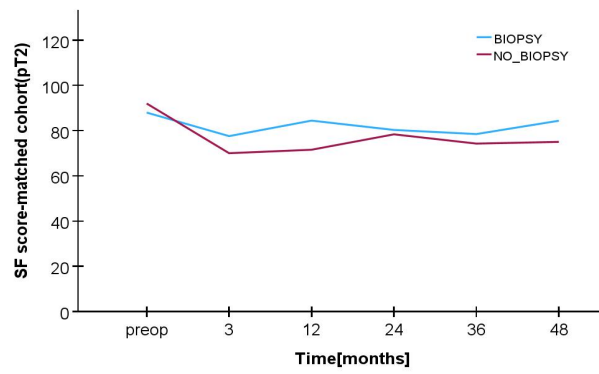

g.

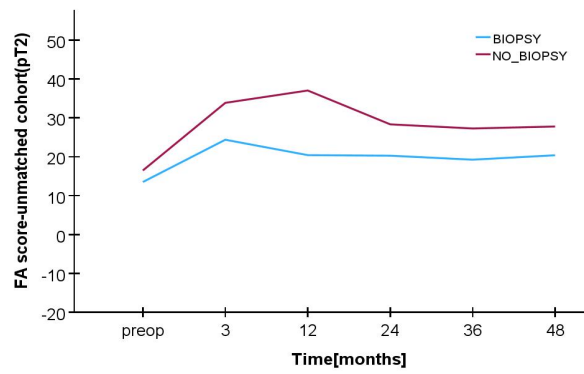

h.

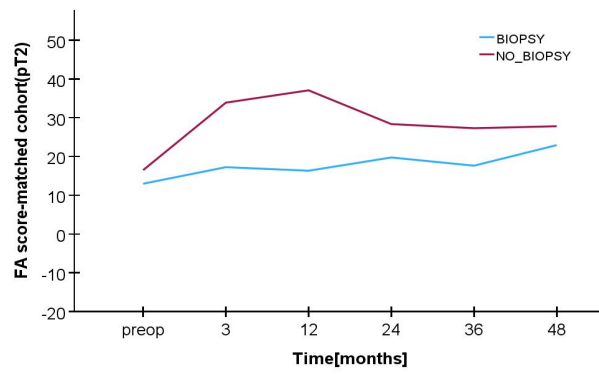

i.

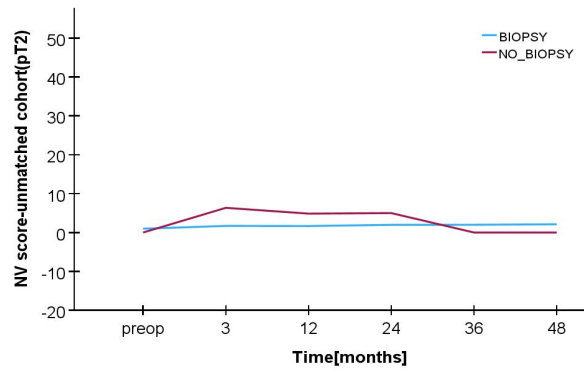

j.

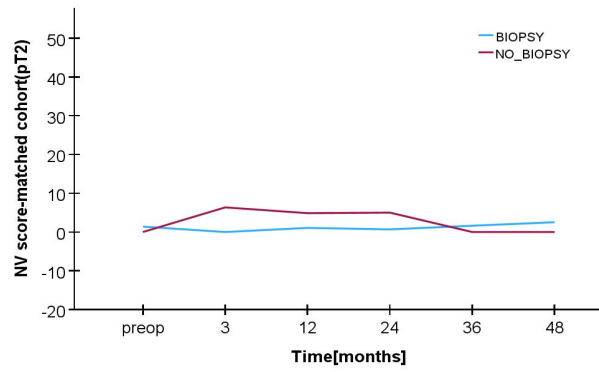

k.

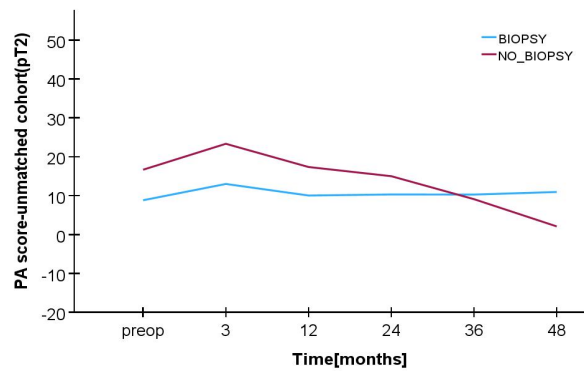

l.

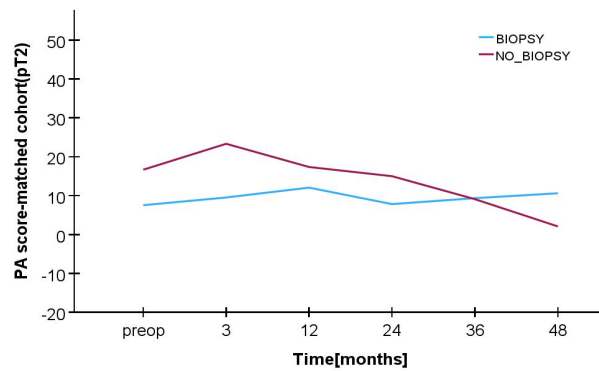



m.

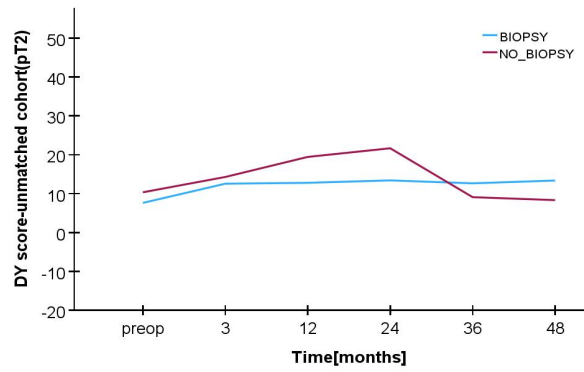

n.

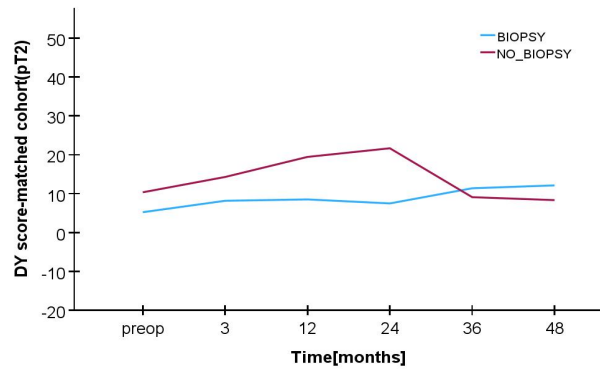

o.

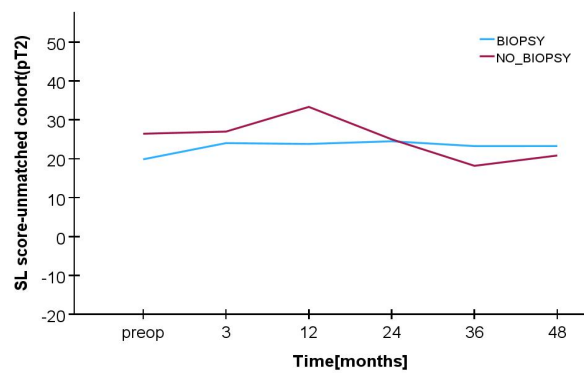

p.

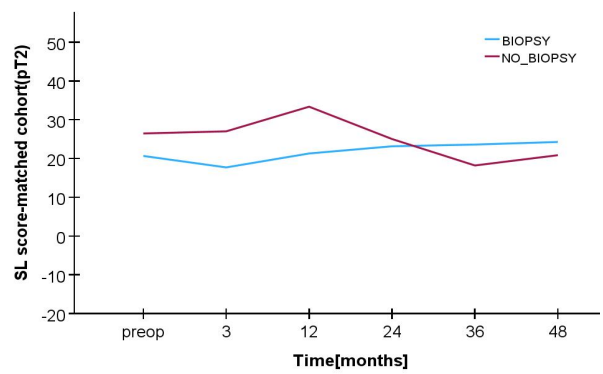

q.

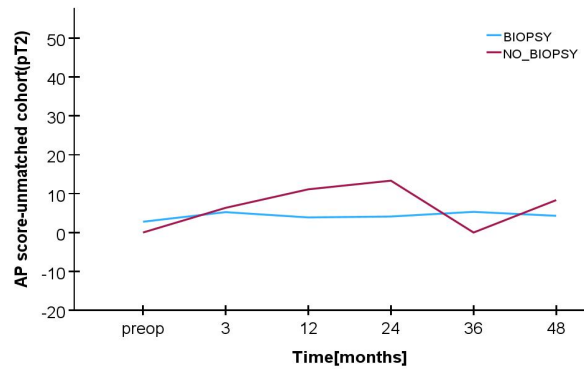

r.

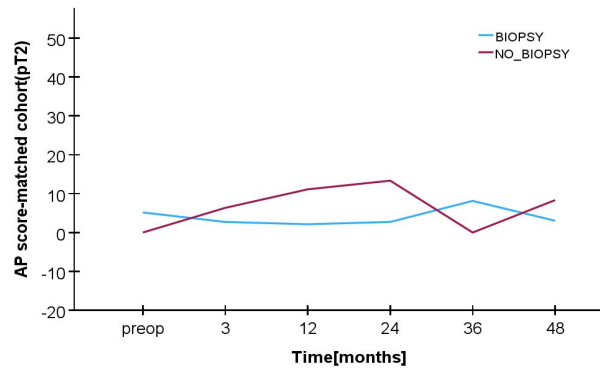

s.

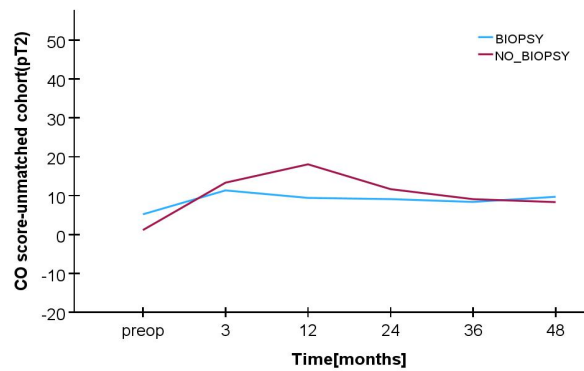

t.

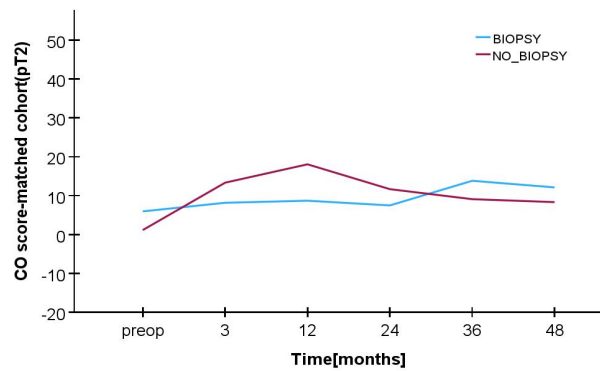

U.

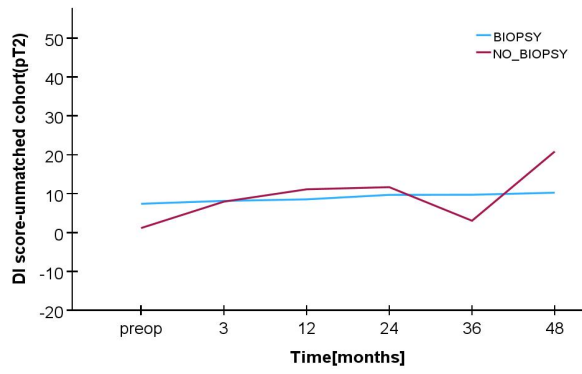

V.

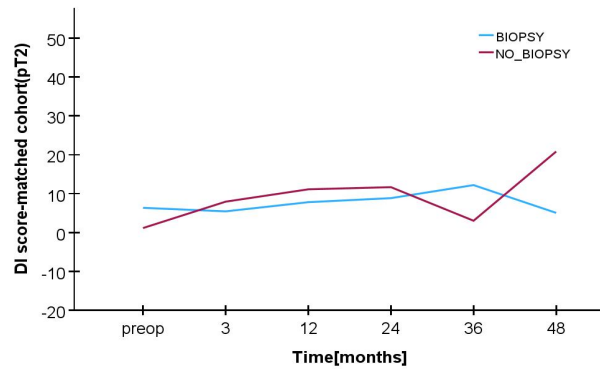

W.

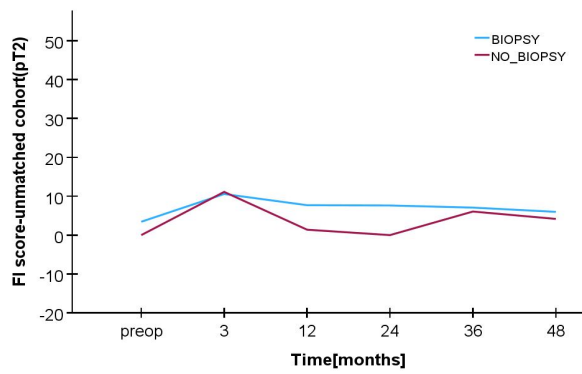

X.

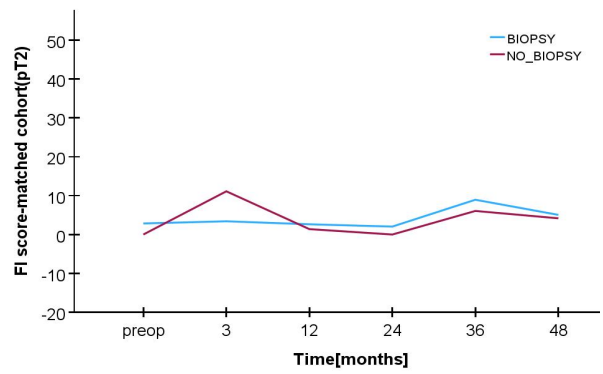

Y.

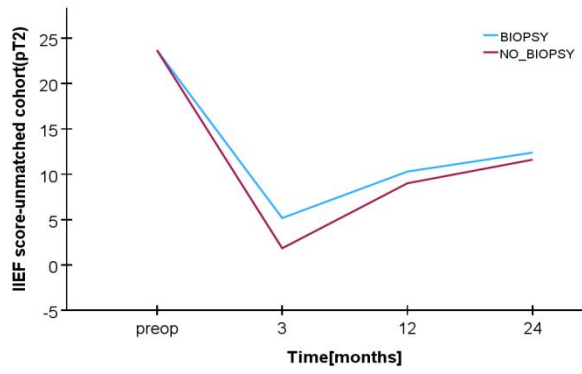

Z.

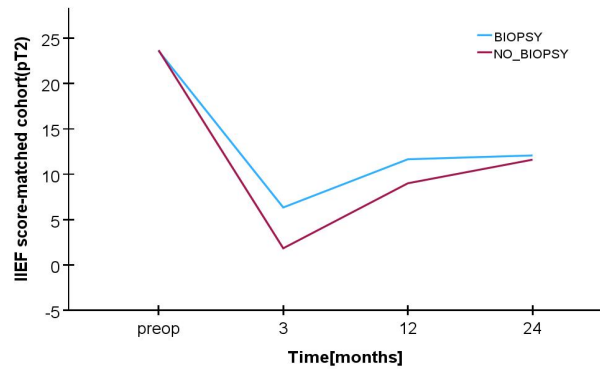

Supplement: Supplementary file 1 [file 943c5a240a2b400706ae6f51.pdf]
